# Supplementary material for: Extracellular phosphorylation of a receptor tyrosine kinase controls synaptic localization of NMDA receptors and regulates pathological pain
Source: PubMed Central journal article supplement (PMC5515392; doi:10.1371/journal.pbio.2002457), 2017-07-18

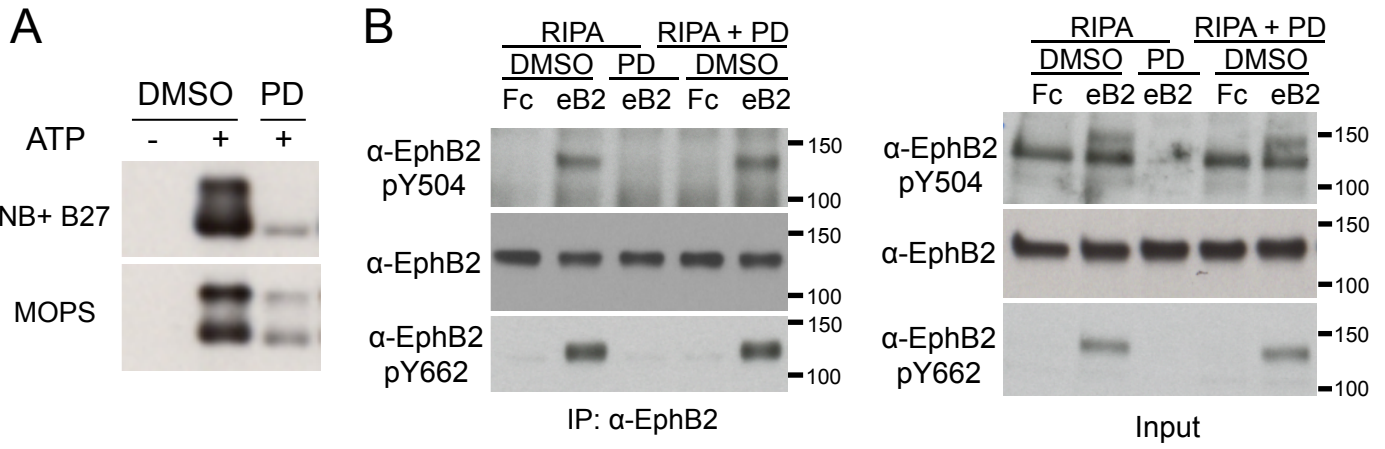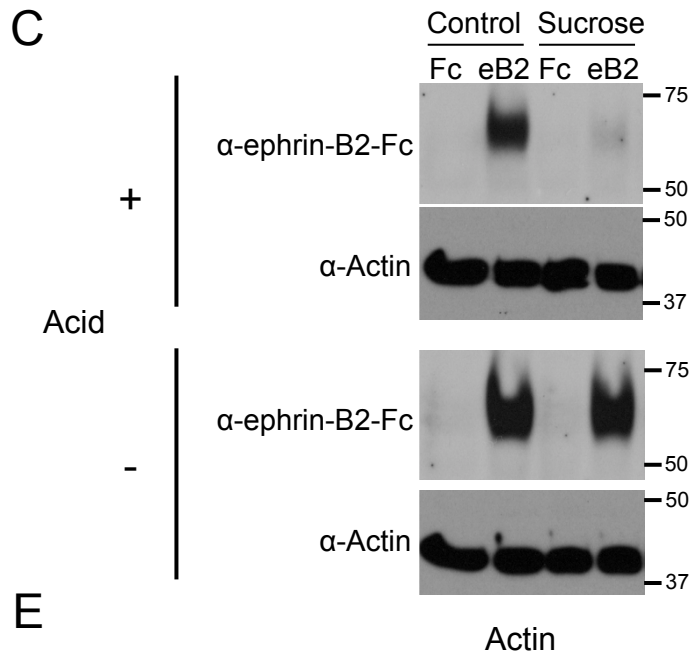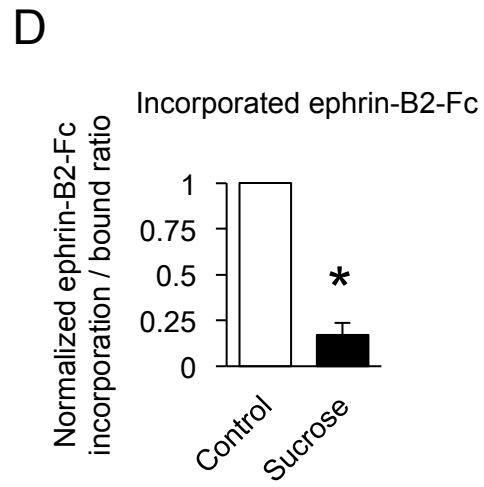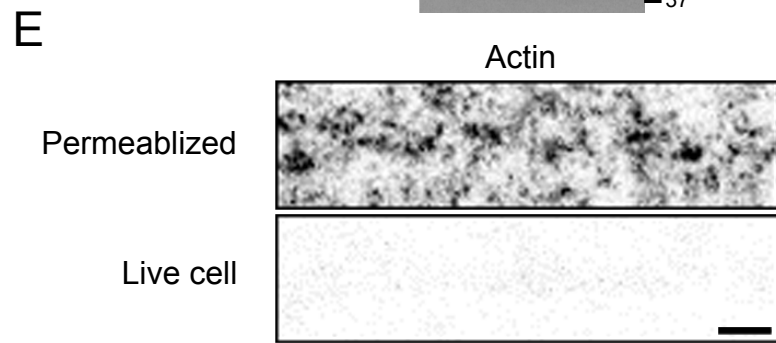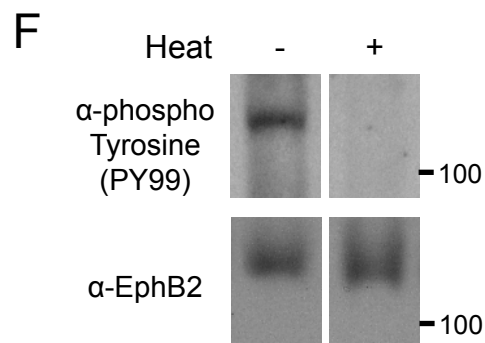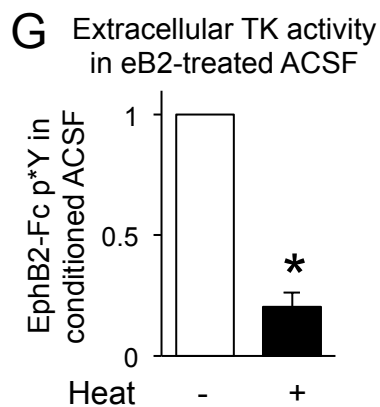

Supplement: pbio.2002457.s002.pdf [file pbio.2002457.s002.pdf]
