# Supplementary material for: Extracellular phosphorylation of a receptor tyrosine kinase controls synaptic localization of NMDA receptors and regulates pathological pain
Source: PubMed Central journal article supplement (PMC5515392; doi:10.1371/journal.pbio.2002457), 2017-07-18

**A**

## HEK 293T EphB1 Co-IP

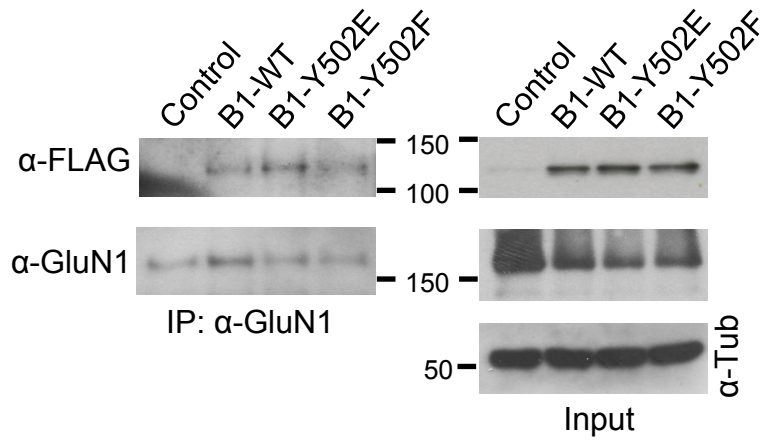**B**

## p\*Y in HEK 293T

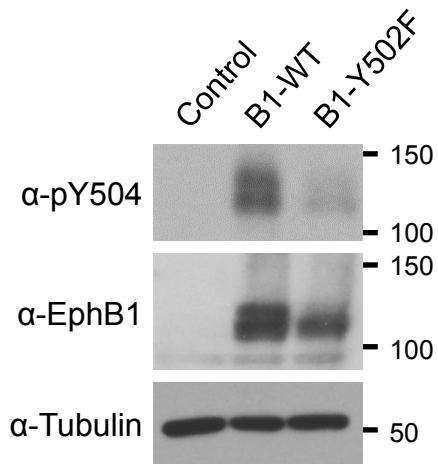**C**

## p\*Y in Spinal Cord

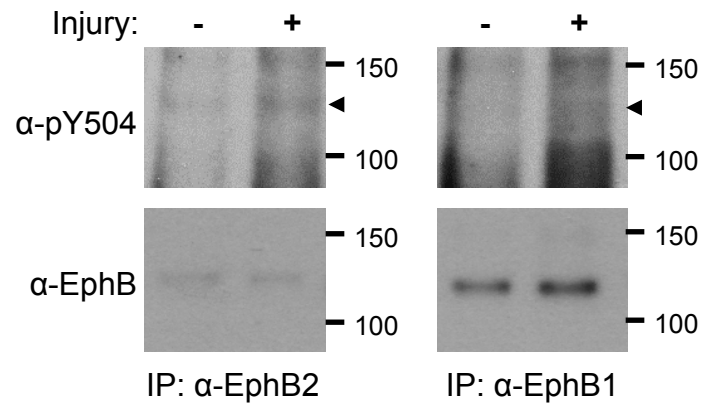

Supplement: pbio.2002457.s007.pdf [file pbio.2002457.s007.pdf]
